# Supplementary material for: Highly homogeneous core–sheath polyaniline nanofibers obtained by polymerisation on a wire-shaped template
Source: Royal Society of Chemistry journal article supplement (doi:10.1039/c4py00722k), 2014-01-01
Supplement: c4py00722k1.pdf [file c4py00722k1.pdf]

## Electronic Supplementary Information (ESI)

### Highly homogeneous core-sheath polyaniline nanofibers by polymerisation on wire-shaped template

Rossella Castagna<sup>1</sup>, Roberto Momentè<sup>1</sup>, Giorgio Pariani<sup>2</sup>, Giuseppe Zerbi<sup>1</sup>, Andrea Bianco<sup>2</sup>, Chiara Bertarelli<sup>1,3\*</sup>

<sup>1</sup>Dipartimento di Chimica Materiali e Ingegneria Chimica “G. Natta”, Politecnico di Milano, piazza Leonardo da Vinci 32, 20133 Milano, Italy

<sup>2</sup>Istituto Nazionale di Astrofisica, Osservatorio Astronomico di Brera, via E. Bianchi 46, 23807 Merate, Italy

<sup>3</sup>Center for Nano Science and Technology @PoliMi, Istituto Italiano di Tecnologia, Via Pascoli 70/3, 20133 Milano, Italy

#### Table of contents:

**Figure 1** : SEM images of N-FeA nanofibers.

**Figure 2** : Optical images of N-FeH nanofibers.

**Figure 3** : SEM images of N-ADPA nanofibers.

**Figure 4** : UV- vis reflectance spectra of N6, N-sADPA and N-ADPA nanofibers.

**Figure 5** : FTIR spectra of N6, N-sADPA nanofibers and ADPA molecule.

**Figure 6** : SEM images of N-sADPA after oxidative polymerization.

**Figure 7** : UV-vis reflectance spectra of N-sADPA after oxidative polymerization.

**Figure 8** : UV-vis reflectance spectra of N-sADPA after doping treatment.

**Figure 9** : Diameter distribution of N-sFeH electrospun nanofibers after diffusion step

**Figure 10**: Diameter distribution of N-sADPA electrospun nanofibers before and after oxidative polymerization.

**Figure 11**: FTIR spectra of N-sADPA before and after base treatment

**Table 1** : Assignment of the main IR band.

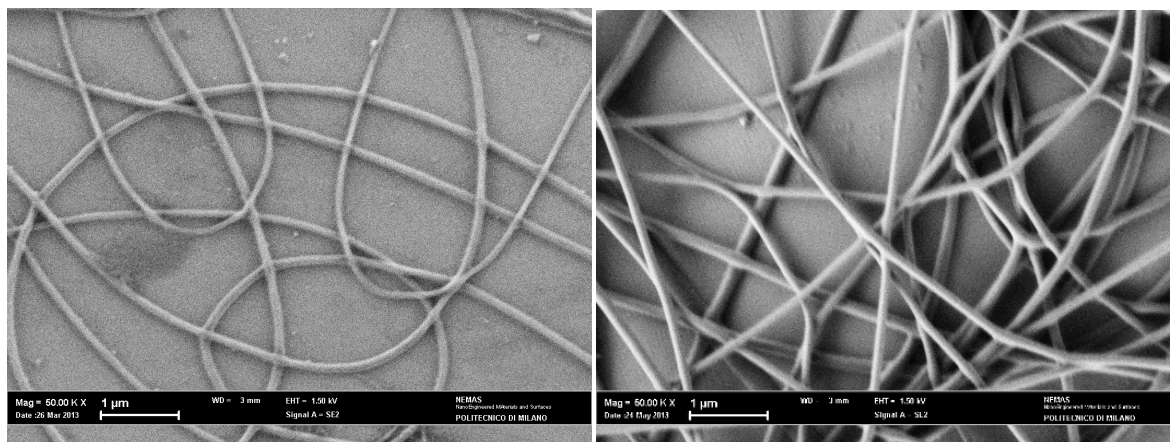

**Figure 1.** SEM images of N-FeA electrospun nanofibers (on the left) and N-FeH electrospun nanofibers (on the right) at 15 kV with a flow rate of 0.05 mL/h.

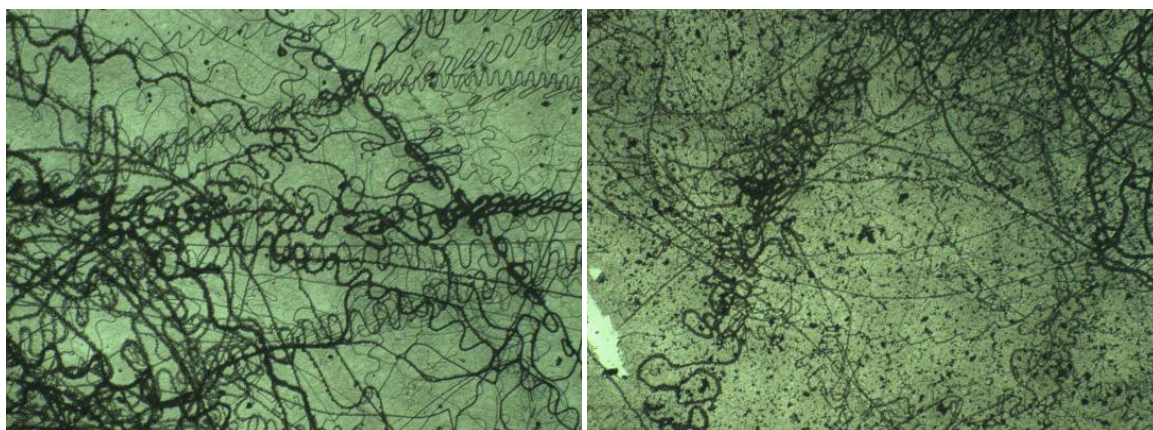

**Figure 2.** OM images of N-FeH (8.85%  $\text{FeCl}_3 \cdot 6\text{H}_2\text{O}$ ) electrospun nanofibers after polymerization treatment (left:  $t_{\text{DIFF}} = 60' + t_{\text{OX}} = 30'$ ; right:  $t_{\text{DIFF}} = 75' + t_{\text{OX}} = 60'$ ).

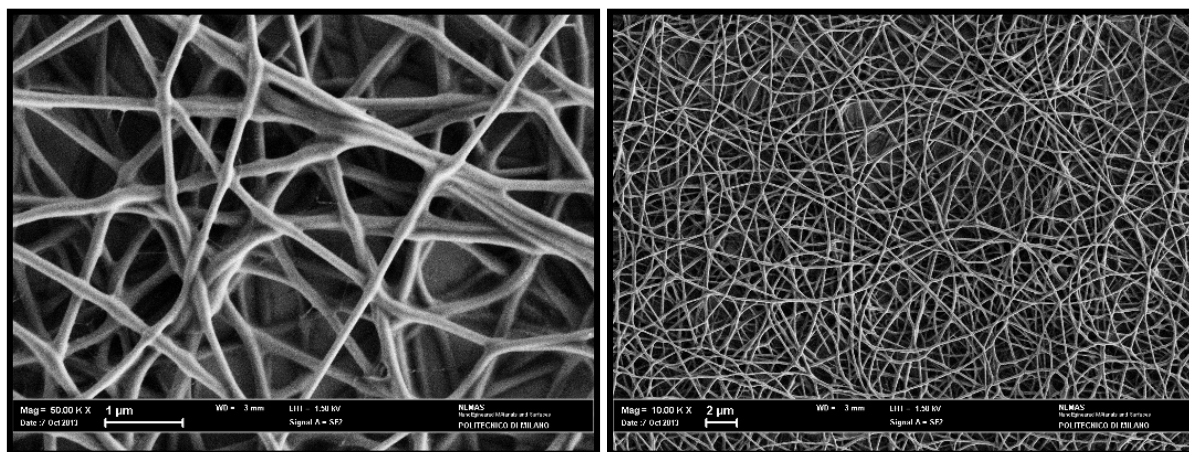

**Figure 3.** SEM images of N-ADPA (67 wt% ADPA) electrospun nanofibers at different magnifications.

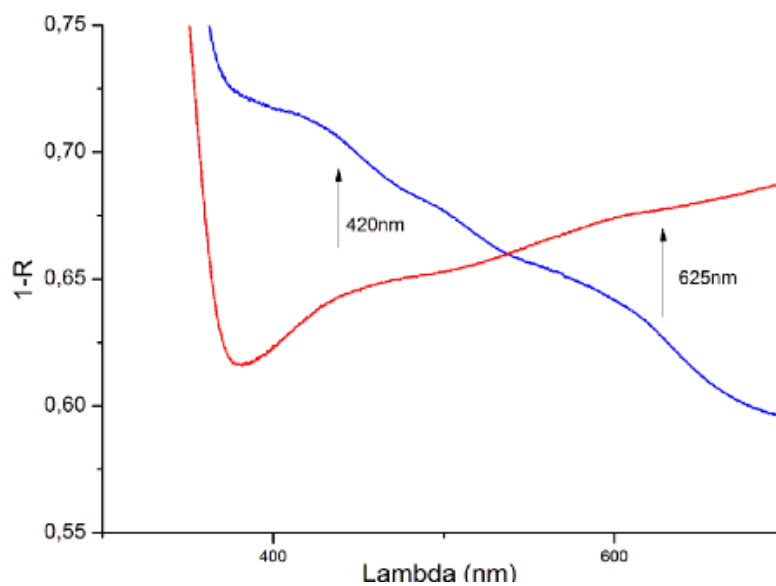

**Figure 4.** UV-Vis reflectance spectra of N6 fibers and N-sADPA nanofibers (blue); N-ADPA nanofibers (red). Magnification of the region between 300 and 700 nm.

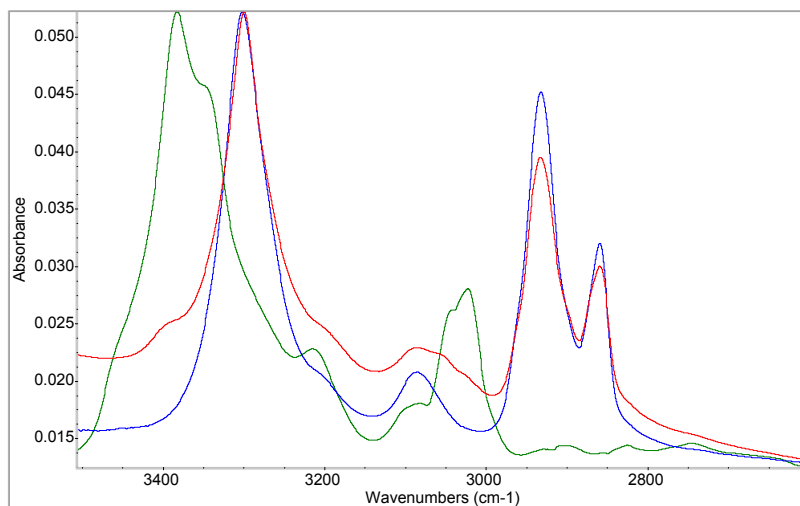

**Figure 5.** FTIR spectra in the region 3500-2600 cm<sup>-1</sup> of electrospun N6 (blue line) and N-sADPA mats (red line), and ADPA film (green line).

Ü

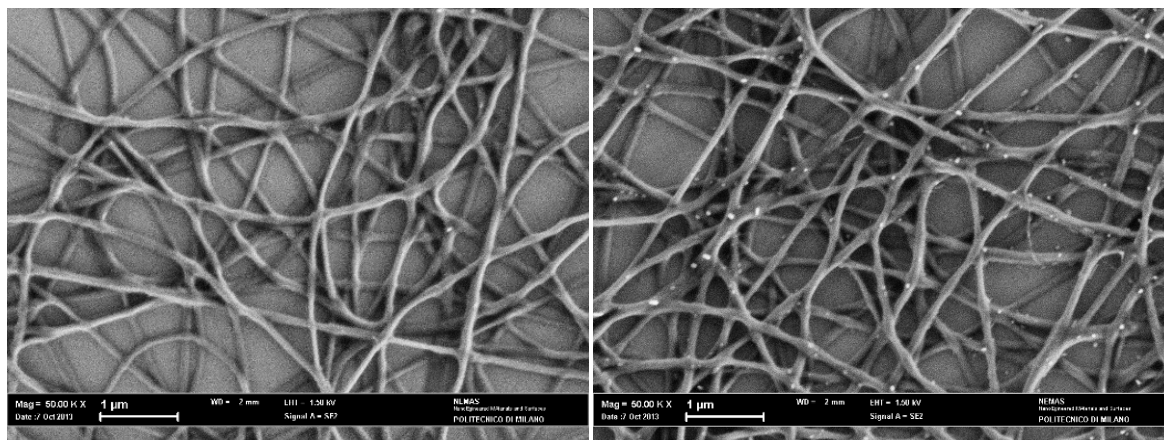

**Figure 6.** SEM images of N-sADPA (67 wt% ADPA) electrospun fibers polymerized in an oxidation bath containing p-TSA (0.175 M) after an oxidative polymerization treatment ( $t_{\text{OX}} = 150$  s).

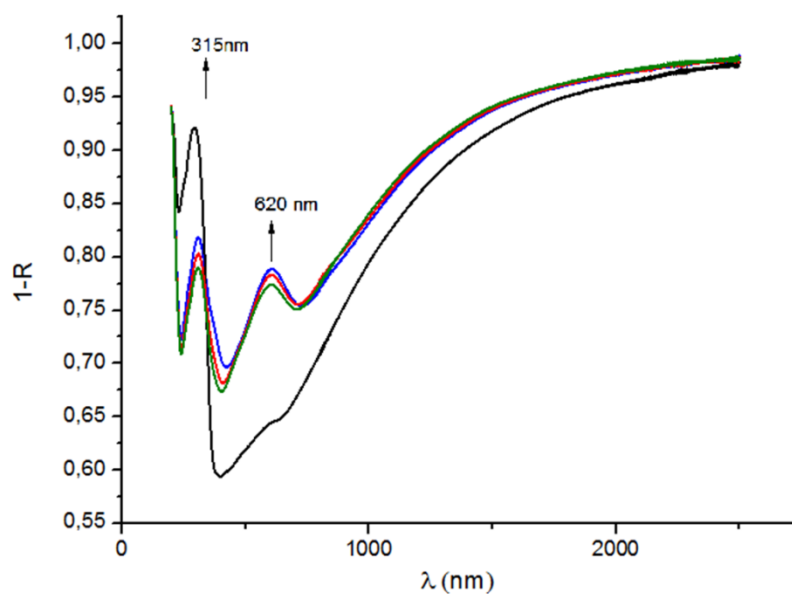

**Figure 7.** UV-Vis reflectance spectra of N-sADPA (67 wt% ADPA) electrospun nanofibers: washed sample (black);  $t_{\text{OX}} = 20$  s (blue);  $t_{\text{OX}} = 50$  s (red);  $t_{\text{OX}} = 120$  s (green).



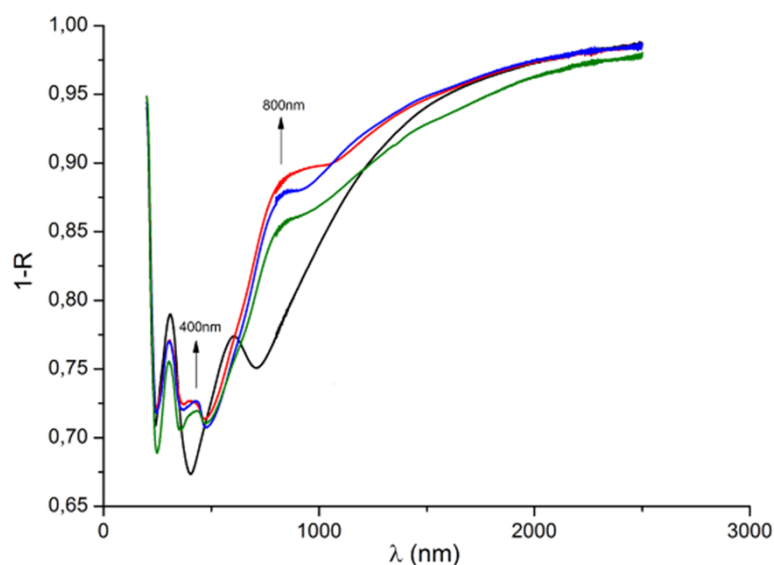

**Figure 8.** UV-Vis reflectance spectra of N-sADPA (67 wt% ADPA) electrospun nanofibers:  $t_{\text{ox}} = 150$  s (black);  $t_{\text{DOP}} = 30$  s (green);  $t_{\text{DOP}} = 60$  s (red);  $t_{\text{DOP}} = 60$  s after 1 h (blue).

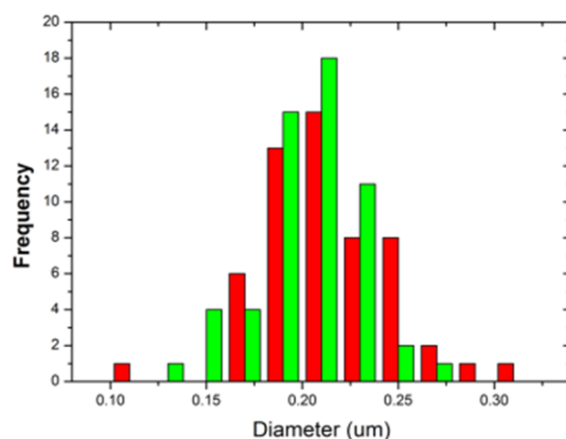

**Figure 9.** Diameter distribution of N-sFeH electrospun nanofibers after diffusion step:  $t_{\text{DIFF}} = 120'$  (red) mean diameter is  $214 \pm 35$  nm and  $t_{\text{DIFF}} = 180'$  (green) mean diameter is  $200 \pm 30$  nm.

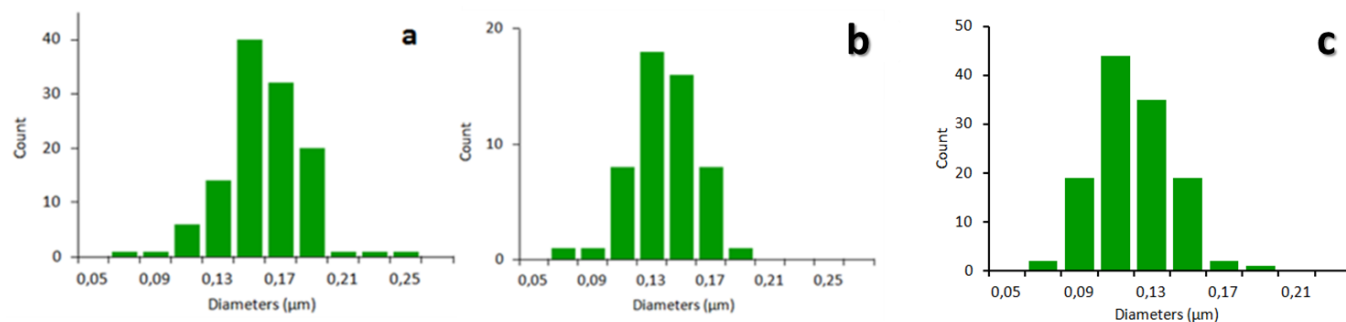

**Figure 10.** Diameter distribution of N-sADPA electrospun nanofibers: a) as spun; b) after oxidative polymerization ( $t_{\text{ox}} = 150$ s).

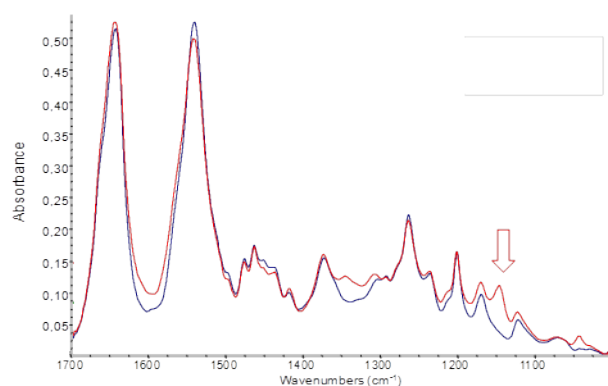

**Figure 11.** FTIR spectra of N-sADPA (67 wt% ADPA vs Nylon 6) in wavenumbers range 1700-500  $\text{cm}^{-1}$ : mat before and after base treatment (KOH 0.175 M). The red arrow indicates the band disappearing by treatment with base.

| Wavenumber ( $\text{cm}^{-1}$ ) | Assignment                                       | Material*          | Wavenumber ( $\text{cm}^{-1}$ ) | Assignment                                                        | Material* |
|---------------------------------|--------------------------------------------------|--------------------|---------------------------------|-------------------------------------------------------------------|-----------|
| 3450                            | Aromatic secondary amine: <i>N-H stretching</i>  | ADPA               | 1600                            | Primary amine: <i>N-H bending</i>                                 | ADPA      |
| 3380                            | Aromatic primary amine: <i>N-H stretching</i>    | ADPA               | 1542                            | Amide II                                                          | Nylon 6   |
| 3300                            | Aliphatic secondary amine: <i>N-H stretching</i> | Nylon 6            | 1520-1490                       | Aromatic ring: <i>stretch</i>                                     | ADPA      |
| 3100 - 3000                     | Aromatic ring <i>C-H stretching</i>              | ADPA               | 1460-1440                       | $-(\text{CH}_2)-$ <i>bending</i>                                  | Nylon 6   |
| 2930                            | $-(\text{CH}_2)-$ <i>asymmetric stretching</i>   | <i>C-H</i> Nylon 6 | 1360                            | $-(\text{CH}_2)-$ <i>wagging</i>                                  | Nylon 6   |
| 2850                            | $-(\text{CH}_2)-$ <i>symmetric stretching</i>    | <i>C-H</i> Nylon 6 | 1350-1280                       | Aromatic secondary amine: <i>C-N stretch</i>                      | ADPA      |
| 1650                            | Amide I                                          | Nylon 6            | 830                             | Aromatic C-H 1,4-disubstituted phenyl <i>out-of-plane bending</i> | ADPA      |
| 1620                            | Aromatic ring: <i>stretching</i>                 | ADPA               | 750 - 700                       | Aromatic C-H Monosubstituted phenyl <i>out-of-plane bending</i>   | ADPA      |

**Table 1.** Assignment of the main IR bands: main wavenumbers, IR mode and material correlation. (\**N*-phenyl-1,4-phenylenediamine - ADPA)
